# Supplementary material for: Effects of Surface Wave Breaking Caused by Internal Solitary Waves in SAR Altimeter: Sentinel-3 Copernicus Products and Advanced New Products
Source: MDPI journal article supplement (doi:10.3390/rs14030587), 2022-01-26
Supplement: s1 [file s1]

## Supplementary Materials

**Table S1.** List of Sentinel-3 cases in SAR-mode retracking approach exhibiting large-scale ISWs in optical imagery (OLCI) in synergy with the corresponding sea surface signatures in the SRAL altimeter. Note that cases are referring to the Banda Sea in the Indian Ocean before 27 September 2018, and the Tropical Western Atlantic after that, and that some dates include two or three ISWs, which were captured in the same image (i.e. relative orbit and cycle).

| Products   |                       |            |                   | FFSAR 10 Bins       |                    |                     | FFSAR MSS 10 Bins   |                    |                     | UFSAR 10 Bins       |                    |                     | UFSAR MSS 10 Bins   |                    |                     |
|------------|-----------------------|------------|-------------------|---------------------|--------------------|---------------------|---------------------|--------------------|---------------------|---------------------|--------------------|---------------------|---------------------|--------------------|---------------------|
| Date       | Rel<br>·<br>Or<br>bit | Cy-<br>cle | ISW (°E;<br>°N)   | SWH<br>front<br>(m) | SWH<br>rear<br>(m) | Delta<br>SWH<br>(m) |
| 27.10.2018 | 188<br>A              | 37         | 125,51; -<br>6,12 | 0,65498             | 0,5572<br>2        | 0,0977<br>6         | 0,7293<br>1         | 0,6423<br>5        | 0,0869<br>6         | 0,7768<br>9         | 0,5888<br>2        | 0,1880<br>7         | 0,6629<br>6         | 0,4690<br>4        | 0,1939<br>2         |
|            |                       |            | 125,27; -<br>7,23 | 0,67255             | 0,5143<br>4        | 0,1582<br>1         | 0,7419<br>9         | 0,6508<br>3        | 0,0911<br>6         | 0,7393<br>4         | 0,4314<br>8        | 0,3078<br>6         | 0,5793<br>7         | 0,5748             | 0,0045<br>7         |
| 25.03.2019 | 245<br>B              | 23         | 125,93; -<br>6,34 | 0,73353             | 0,6831<br>3        | 0,0504              | 0,7771<br>1         | 0,7911<br>2        | -<br>0,0140<br>1    | 0,8561<br>3         | 0,6626<br>2        | 0,1935<br>1         | 0,7462<br>2         | 0,6803<br>8        | 0,0658<br>4         |
| 10.06.2019 | 188<br>B              | 26         | 124,85; -<br>6,53 | 1,197               | 0,7788<br>3        | 0,4181<br>7         | 1,3436              | 1,0638             | 0,2798              | 1,2636              | 0,4766<br>5        | 0,7869<br>5         | 1,3486              | 1,1306             | 0,218               |
| 20.08.2019 | 188<br>A              | 48         | 125,68; -<br>5,32 | 1,3136              | 1,3202             | -0,0066             | 1,3927              | 1,4066             | -0,0139             | 1,2951              | 1,3822             | -0,0871             | 1,3585              | 1,4619             | -0,1034             |
|            |                       |            | 125,49; -<br>6,24 | 1,1694              | 0,9009<br>8        | 0,2684<br>2         | 1,252               | 0,9829             | 0,2691              | 1,3446              | 0,8805<br>1        | 0,4640<br>9         | 1,2551              | 0,9649<br>2        | 0,2901<br>8         |
| 03.09.2019 | 245<br>B              | 29         | 125,93; -<br>6,37 | 1,2066              | 1,0087             | 0,1979              | 1,3095              | 1,1086             | 0,2009              | 1,2176              | 1,0579             | 0,1597              | 1,2826              | 1,1541             | 0,1285              |
| 16.09.2019 | 188<br>A              | 49         | 125,45; -<br>6,38 | 1,6169              | 1,2962             | 0,3207              | 1,699               | 1,3643             | 0,3347              | 1,1522              | 1,0943             | 0,0579              | 1,2786              | 1,2761             | 0,0025              |
|            |                       |            | 125,23; -<br>7,34 | 1,1833              | 1,0696             | 0,1137              | 1,2769              | 1,259              | 0,0179              | 0,9997<br>5         | 1,1558             | -<br>0,1560<br>5    | 1,2149              | 1,2671             | -0,0522             |

|            |       |    |                |         |          |            |          |          |            |          |          |            |          |          |            |
|------------|-------|----|----------------|---------|----------|------------|----------|----------|------------|----------|----------|------------|----------|----------|------------|
| 30.09.2019 | 245 B | 30 | 125,95; - 6,27 | 1,086   | 0,8825 6 | 0,2034 4   | 1,1663   | 0,9557 4 | 0,2105 6   | 1,1142   | 0,9003 1 | 0,2138 9   | 1,1732   | 0,9449 9 | 0,2282 1   |
|            |       |    | 125,70; - 7,33 | 0,8039  | 0,8185 1 | - 0,0146 1 | 0,8943 8 | 0,9429 5 | - 0,0485 7 | 0,6086 4 | 1,1416   | - 0,5329 6 | 0,9287 8 | 0,9639 5 | - 0,0351 7 |
| 02.05.2021 | 188 A | 71 | 125,47; - 6,21 | 1,5816  | 1,2243   | 0,3573     | 1,6308   | 1,2922   | 0,3386     | 1,5761   | 1,169    | 0,4071     | 1,6685   | 1,3525   | 0,316      |
|            |       |    | 125,22; - 7,38 | 0,82016 | 0,7400 3 | 0,0801 3   | 0,9234   | 0,9356 2 | - 0,0122 2 | 0,7916 1 | 0,6738 7 | 0,1177 4   | 0,9435 6 | 0,9648 5 | - 0,0212 9 |
| 07.08.2019 | 245 B | 28 | 125,90; - 6,43 | 1,1074  | 0,7714 8 | 0,3359 2   | 1,1883   | 0,8587 3 | 0,3295 7   | 1,1382   | 0,7849 7 | 0,3532 3   | 1,1433   | 0,8253 2 | 0,3179 8   |
|            |       |    | 125,67; - 7,53 | 0,72172 | 0,7149 2 | 0,0068     | 0,8869 6 | 0,8885 2 | - 0,0015 6 | 0,7391 7 | 1,0573   | - 0,3181 3 | 0,9887 2 | 0,9491 4 | 0,0395 8   |
| 27.09.2018 | 152 A | 36 | 43,19; 4,75    | 2,1101  | 2,0144   | 0,0957     | 2,1858   | 2,1373   | 0,0485     | 1,9553   | 1,873    | 0,0823     | 2,1585   | 2,12     | 0,0385     |
| 24.10.2018 | 152 A | 37 | 42,99; 5,71    | 1,8471  | 1,5875   | 0,2596     | 1,9338   | 1,693    | 0,2408     | 1,8274   | 1,6139   | 0,2135     | 1,921    | 1,6899   | 0,2311     |
| 23.08.2019 | 095 B | 29 | 44,56; 4,88    | 1,2512  | 1,1129   | 0,1383     | 1,349    | 1,2648   | 0,0842     | 1,336    | 1,0688   | 0,2672     | 1,3545   | 1,2142   | 0,1403     |
|            |       |    | 44,70; 4,3     | 1,1814  | 1,1967   | -0,0153    | 1,2851   | 1,3413   | -0,0562    | 1,1568   | 1,1577   | -0,0009    | 1,4171   | 1,3093   | 0,1078     |
| 20.11.2019 | 209 B | 32 | 42,24; 6,94    | 2,3598  | 2,0905   | 0,2693     | 2,5183   | 2,3275   | 0,1908     | 2,3494   | 1,8862   | 0,4632     | 2,4828   | 2,3373   | 0,1455     |
|            |       |    | 42,50; 5,78    | 2,0341  | 1,8585   | 0,1756     | 2,1308   | 1,96     | 0,1708     | 2,0085   | 1,6442   | 0,3643     | 2,1063   | 1,9438   | 0,1625     |
| 12.08.2020 | 152 B | 42 | 43,47; 5,56    | 1,971   | 1,5572   | 0,4138     | 2,0765   | 1,638    | 0,4385     | 1,9311   | 1,6252   | 0,3059     | 2,0481   | 1,7884   | 0,2597     |

|            |          |    |             |        |        |        |        |        |        |        |             |             |        |        |        |
|------------|----------|----|-------------|--------|--------|--------|--------|--------|--------|--------|-------------|-------------|--------|--------|--------|
| 04.09.2020 | 095<br>B | 43 | 44,49; 5,22 | 1,99   | 1,7091 | 0,2809 | 2,0655 | 1,8293 | 0,2362 | 1,8622 | 1,6977      | 0,1645      | 2,0748 | 1,7942 | 0,2806 |
|            |          |    | 44,77; 3,95 | 1,6794 | 1,2314 | 0,448  | 1,7692 | 1,3184 | 0,4508 | 1,8252 | 1,4335      | 0,3917      | 1,7418 | 1,2136 | 0,5282 |
|            |          |    | 45,05; 2,74 | 1,5574 | 1,4654 | 0,092  | 1,6558 | 1,5554 | 0,1004 | 1,6239 | 1,5216      | 0,1023      | 1,6475 | 1,5057 | 0,1418 |
| 18.10.2020 | 095<br>A | 64 | 44,05; 5,11 | 1,2056 | 1,0256 | 0,18   | 1,3314 | 1,1513 | 0,1801 | 2,0525 | 0,9833<br>5 | 1,0691<br>5 | 1,3792 | 1,0812 | 0,298  |
|            |          |    | 44,30; 3,98 | 1,5382 | 1,3015 | 0,2367 | 1,6293 | 1,4165 | 0,2128 | 1,5038 | 1,1084      | 0,3954      | 1,6774 | 1,4119 | 0,2655 |
|            |          |    | 44,62; 2,6  | 1,3381 | 1,2433 | 0,0948 | 1,4427 | 1,3701 | 0,0726 | 1,4722 | 1,018       | 0,4542      | 1,467  | 1,4389 | 0,0281 |
| 03.12.2020 | 366<br>A | 65 | 45,37; 7,55 | 1,5516 | 1,4617 | 0,0899 | 1,6615 | 1,5847 | 0,0768 | 1,6081 | 1,7598      | -0,1517     | 1,7951 | 1,6212 | 0,1739 |
